# Supplementary material for: Dramatically improved optical anisotropy by realizing stereochemically active lone pairs in a sulfate system, K2SO4·HIO3
Source: Royal Society of Chemistry journal article supplement (doi:10.1039/d3qi00192j), 2023-01-01
Supplement: d3qi00192j1.pdf [file d3qi00192j1.pdf]

**Dramatically improved optical anisotropy by realizing  
stereochemically active lone pairs in a sulfate system,  
 $\text{K}_2\text{SO}_4 \cdot \text{HIO}_3$**

Zhiyong Bai and Kang Min Ok\*

Department of Chemistry, Sogang University, Seoul 04107, Republic of Korea

Email: kmok@sogang.ac.kr

**Table S1. Crystal data and structure refinement.**

|                                                                         |                                                                              |
|-------------------------------------------------------------------------|------------------------------------------------------------------------------|
| Empirical formula                                                       | HIK <sub>2</sub> O <sub>7</sub> S                                            |
| Formula weight                                                          | 350.17                                                                       |
| Temperature/K                                                           | 300.00                                                                       |
| Crystal system                                                          | monoclinic                                                                   |
| Space group                                                             | <i>P</i> 2 <sub>1</sub> / <i>n</i>                                           |
| <i>a</i> /Å                                                             | 7.4215(8)                                                                    |
| <i>b</i> /Å                                                             | 7.1578(8)                                                                    |
| <i>c</i> /Å                                                             | 13.8021(15)                                                                  |
| $\beta$ /°                                                              | 93.330(4)                                                                    |
| Volume/Å <sup>3</sup> , Z                                               | 731.95(14), 4                                                                |
| $\rho_{\text{calc}}$ g/cm <sup>3</sup>                                  | 3.178                                                                        |
| $\mu$ /mm <sup>-1</sup>                                                 | 5.787                                                                        |
| <i>F</i> (000)                                                          | 656.0                                                                        |
| Radiation                                                               | Mo K $\alpha$ ( $\lambda$ = 0.71073)                                         |
| 2 $\Theta$ range for data collection/°                                  | 5.914 to 56.704                                                              |
| Index ranges                                                            | -9 $\leq$ h $\leq$ 9, -9 $\leq$ k $\leq$ 9, -18 $\leq$ l $\leq$ 18           |
| Reflections collected                                                   | 26266                                                                        |
| Independent reflections                                                 | 1833 [ <i>R</i> <sub>int</sub> = 0.0663, <i>R</i> <sub>sigma</sub> = 0.0190] |
| Data/restraints/parameters                                              | 1833/2/109                                                                   |
| Goodness-of-fit on <i>F</i> <sup>2</sup>                                | 1.153                                                                        |
| Final R indexes [ <i>I</i> $\geq$ 2 $\sigma$ ( <i>I</i> )] <sup>a</sup> | <i>R</i> <sub>1</sub> = 0.0168, <i>wR</i> <sub>2</sub> = 0.0411              |
| Final R indexes [all data] <sup>a</sup>                                 | <i>R</i> <sub>1</sub> = 0.0182, <i>wR</i> <sub>2</sub> = 0.0416              |
| Largest diff. peak/hole / e Å <sup>-3</sup>                             | 0.85/-0.58                                                                   |

<sup>a</sup>*R*<sub>1</sub> =  $\sum ||F_o| - |F_c|| / \sum |F_o|$  and *wR*<sub>2</sub> =  $[\sum (F_o^2 - F_c^2)^2 / \sum w(F_o^2)^2]^{1/2}$  for *F*<sub>o</sub><sup>2</sup> > 2 $\sigma$ (*F*<sub>o</sub><sup>2</sup>).

**Table S2.** Fractional Atomic Coordinates ( $\times 10^4$ ) and Equivalent Isotropic Displacement Parameters ( $\text{\AA}^2 \times 10^3$ ).  $U_{\text{eq}}$  is defined as 1/3 of the trace of the orthogonalised  $U_{ij}$  tensor.

| Atom | <i>x</i>    | <i>y</i>  | <i>z</i>   | $U(\text{eq})$ |
|------|-------------|-----------|------------|----------------|
| I1   | 8075.4(2)   | 3605.4(2) | 4522.5(2)  | 11.76(6)       |
| K1   | 6688.0(7)   | 8843.9(7) | 5807.7(4)  | 20.53(11)      |
| K2   | 989.2(7)    | 1579.7(7) | 6787.8(4)  | 21.70(11)      |
| S1   | 5760.4(7)   | 3504.8(6) | 6577.7(4)  | 12.60(11)      |
| O1   | 10336.1(18) | 2979(2)   | 4923.7(11) | 17.8(3)        |
| O2   | 5785(2)     | 3260(2)   | 7641.6(11) | 22.2(3)        |
| O3   | 7531(2)     | 2861(2)   | 6239.3(11) | 22.2(3)        |
| O4   | 5486(2)     | 5480(2)   | 6334.2(12) | 23.8(3)        |
| O5   | 4328(2)     | 2373(2)   | 6103.5(12) | 25.6(4)        |
| O6   | 8656(2)     | 4379(2)   | 3250.9(10) | 18.3(3)        |
| O7   | 7177(2)     | 1362(2)   | 4203.3(12) | 20.9(3)        |

**Table S3.** Anisotropic Displacement Parameters ( $\text{\AA}^2 \times 10^3$ ). The Anisotropic displacement factor exponent takes the form:  $-2\pi^2[h^2a^{*2}U_{11}+2hka^*b^*U_{12}+\dots]$ .

| Atom | U <sub>11</sub> | U <sub>22</sub> | U <sub>33</sub> | U <sub>23</sub> | U <sub>13</sub> | U <sub>12</sub> |
|------|-----------------|-----------------|-----------------|-----------------|-----------------|-----------------|
| I1   | 10.40(8)        | 12.56(9)        | 12.30(9)        | -0.31(4)        | 0.49(5)         | -0.12(4)        |
| K1   | 18.8(2)         | 19.3(2)         | 23.2(2)         | 1.45(18)        | -0.73(18)       | -1.86(17)       |
| K2   | 17.6(2)         | 25.3(2)         | 22.1(2)         | 7.73(18)        | 0.06(18)        | -1.19(17)       |
| S1   | 11.7(2)         | 14.2(2)         | 12.0(2)         | 0.39(16)        | 2.16(18)        | -0.76(16)       |
| O1   | 10.9(7)         | 23.4(8)         | 19.1(7)         | 1.4(6)          | 0.4(5)          | 3.8(6)          |
| O2   | 25.4(8)         | 28.8(8)         | 12.5(7)         | 0.4(6)          | 3.3(6)          | -2.2(7)         |
| O3   | 15.5(7)         | 31.2(9)         | 20.6(8)         | 4.3(7)          | 6.7(6)          | 6.1(6)          |
| O4   | 25.6(8)         | 16.3(7)         | 29.7(9)         | 6.5(6)          | 3.5(7)          | 2.4(6)          |
| O5   | 22.4(8)         | 31.5(9)         | 22.7(8)         | -6.2(7)         | 0.2(6)          | -12.0(7)        |
| O6   | 20.6(7)         | 22.5(8)         | 11.9(7)         | 1.8(6)          | 3.0(6)          | 3.8(6)          |
| O7   | 21.1(8)         | 14.3(7)         | 27.5(9)         | -3.2(6)         | 2.0(6)          | -4.4(6)         |

**Table S4.** Interatomic distances.

| Atom | Atom            | Length/Å   | Atom | Atom             | Length/Å   |
|------|-----------------|------------|------|------------------|------------|
| I1   | O1              | 1.7929(14) | K1   | O5 <sup>7</sup>  | 3.1141(19) |
| I1   | O6              | 1.9132(15) | K1   | O7 <sup>7</sup>  | 2.8943(17) |
| I1   | O7              | 1.7841(14) | K1   | O7 <sup>1</sup>  | 2.8715(17) |
| S1   | O2              | 1.4779(16) | K2   | O1 <sup>11</sup> | 2.7772(16) |
| S1   | O3              | 1.4928(15) | K2   | O2 <sup>10</sup> | 2.8498(18) |
| S1   | O4              | 1.4647(16) | K2   | O3 <sup>11</sup> | 2.7883(16) |
| S1   | O5              | 1.4608(15) | K2   | O4 <sup>10</sup> | 2.9775(18) |
| K1   | O1 <sup>8</sup> | 2.8034(15) | K2   | O5               | 2.7614(17) |
| K1   | O2 <sup>9</sup> | 2.7942(16) | K2   | O6 <sup>1</sup>  | 2.9057(18) |
| K1   | O3 <sup>7</sup> | 2.9955(18) | K2   | O6 <sup>12</sup> | 2.8288(16) |
| K1   | O4              | 2.6825(16) | K2   | O7 <sup>13</sup> | 2.8936(17) |
| K1   | O5 <sup>1</sup> | 2.8379(16) |      |                  |            |

<sup>1</sup>1-X, 1-Y, 1-Z; <sup>2</sup>+X, -1+Y, +Z; <sup>3</sup>1/2+X, 1/2-Y, -1/2+Z; <sup>4</sup>1+X, +Y, +Z; <sup>5</sup>1-X, 2-Y, 1-Z; <sup>6</sup>1+X, 1+Y, +Z; <sup>7</sup>+X, 1+Y, +Z; <sup>8</sup>2-X, 1-Y, 1-Z; <sup>9</sup>3/2-X, 1/2+Y, 3/2-Z; <sup>10</sup>1/2-X, -1/2+Y, 3/2-Z; <sup>11</sup>-1+X, +Y, +Z; <sup>12</sup>-1/2+X, 1/2-Y, 1/2+Z; <sup>13</sup>1-X, -Y, 1-Z.

**Table S5.** Bond angles.

| Atom            | Atom | Atom            | Angle/°     | Atom             | Atom | Atom             | Angle/°   |
|-----------------|------|-----------------|-------------|------------------|------|------------------|-----------|
| O7              | I1   | O1              | 100.41(7)   | O1 <sup>10</sup> | K2   | O2 <sup>12</sup> | 23.24(3)  |
| O7              | I1   | O6              | 97.74(7)    | O1 <sup>10</sup> | K2   | O3 <sup>10</sup> | 76.44(3)  |
| O1 <sup>8</sup> | K1   | O3 <sup>7</sup> | 63.442(15)  | O1 <sup>10</sup> | K2   | O4 <sup>12</sup> | 141.44(4) |
| O1 <sup>8</sup> | K1   | O5 <sup>1</sup> | 120.04(2)   | O1 <sup>10</sup> | K2   | O6 <sup>1</sup>  | 119.88(5) |
| O1 <sup>8</sup> | K1   | O5 <sup>7</sup> | 165.400(17) | O1 <sup>10</sup> | K2   | O6 <sup>13</sup> | 61.41(4)  |
| O1 <sup>8</sup> | K1   | O7 <sup>1</sup> | 105.171(16) | O1 <sup>10</sup> | K2   | O7 <sup>14</sup> | 148.06(5) |
| O1 <sup>8</sup> | K1   | O7 <sup>7</sup> | 67.793(17)  | O2 <sup>12</sup> | K2   | O4 <sup>12</sup> | 106.43(4) |
| O2 <sup>9</sup> | K1   | O1 <sup>8</sup> | 66.339(15)  | O2 <sup>12</sup> | K2   | O6 <sup>1</sup>  | 45.45(3)  |
| O2 <sup>9</sup> | K1   | O3 <sup>7</sup> | 118.07(4)   | O2 <sup>12</sup> | K2   | O7 <sup>14</sup> | 24.77(3)  |
| O2 <sup>9</sup> | K1   | O5 <sup>7</sup> | 121.20(4)   | O3 <sup>10</sup> | K2   | O2 <sup>12</sup> | 38.33(3)  |
| O2 <sup>9</sup> | K1   | O5 <sup>1</sup> | 73.37(3)    | O3 <sup>10</sup> | K2   | O4 <sup>12</sup> | 49.62(4)  |
| O2 <sup>9</sup> | K1   | O7 <sup>1</sup> | 135.21(4)   | O3 <sup>10</sup> | K2   | O6 <sup>1</sup>  | 90.69(4)  |
| O2 <sup>9</sup> | K1   | O7 <sup>7</sup> | 111.01(5)   | O3 <sup>10</sup> | K2   | O6 <sup>13</sup> | 85.22(5)  |
| O3 <sup>7</sup> | K1   | O5 <sup>7</sup> | 72.23(5)    | O3 <sup>10</sup> | K2   | O7 <sup>14</sup> | 86.80(5)  |
| O4              | K1   | O1 <sup>8</sup> | 152.33(5)   | O5               | K2   | O1 <sup>10</sup> | 58.79(4)  |
| O4              | K1   | O2 <sup>9</sup> | 141.43(5)   | O5               | K2   | O2 <sup>12</sup> | 135.55(4) |
| O4              | K1   | O3 <sup>7</sup> | 82.99(5)    | O5               | K2   | O3 <sup>10</sup> | 137.08(4) |
| O4              | K1   | O5 <sup>7</sup> | 125.35(4)   | O5               | K2   | O4 <sup>12</sup> | 73.79(5)  |
| O4              | K1   | O5 <sup>1</sup> | 160.32(4)   | O5               | K2   | O6 <sup>1</sup>  | 134.75(5) |
| O4              | K1   | O7 <sup>7</sup> | 46.62(4)    | O5               | K2   | O6 <sup>13</sup> | 132.03(5) |
| O4              | K1   | O7 <sup>1</sup> | 92.53(4)    | O5               | K2   | O7 <sup>14</sup> | 137.27(5) |
| O5 <sup>1</sup> | K1   | O3 <sup>7</sup> | 72.44(5)    | O6 <sup>13</sup> | K2   | O2 <sup>12</sup> | 124.34(3) |
| O5 <sup>1</sup> | K1   | O5 <sup>7</sup> | 82.42(5)    | O6 <sup>1</sup>  | K2   | O4 <sup>12</sup> | 69.74(3)  |
| O5 <sup>1</sup> | K1   | O7 <sup>1</sup> | 112.25(5)   | O6 <sup>13</sup> | K2   | O4 <sup>12</sup> | 133.11(3) |
| O5 <sup>1</sup> | K1   | O7 <sup>7</sup> | 142.78(5)   | O6 <sup>13</sup> | K2   | O6 <sup>1</sup>  | 85.17(5)  |
| O7 <sup>1</sup> | K1   | I1 <sup>1</sup> | 124.80(5)   | O6 <sup>13</sup> | K2   | O7 <sup>14</sup> | 108.50(4) |

| Atom            | Atom | Atom            | Angle/°   | Atom             | Atom | Atom             | Angle/°    |
|-----------------|------|-----------------|-----------|------------------|------|------------------|------------|
| O7 <sup>1</sup> | K1   | O3 <sup>7</sup> | 110.17(4) | O7 <sup>14</sup> | K2   | O4 <sup>12</sup> | 108.47(4)  |
| O7 <sup>7</sup> | K1   | O3 <sup>7</sup> | 129.21(4) | O7 <sup>14</sup> | K2   | O6 <sup>1</sup>  | 82.48(3)   |
| O7 <sup>7</sup> | K1   | O5 <sup>7</sup> | 133.09(4) | O2               | S1   | O3               | 150.76(2)  |
| O7 <sup>1</sup> | K1   | O5 <sup>7</sup> | 87.78(5)  | O4               | S1   | O2               | 140.45(7)  |
| O7 <sup>1</sup> | K1   | O7 <sup>7</sup> | 82.95(5)  | O4               | S1   | O3               | 149.08(7)  |
| O5              | S1   | O3              | 59.84(7)  | O5               | S1   | O2               | 109.83(10) |
| O5              | S1   | O4              | 110.74(7) |                  |      |                  |            |

<sup>1</sup>1-X, 1-Y, 1-Z; <sup>2</sup>+X, -1+Y, +Z; <sup>3</sup>1/2+X, 1/2-Y, -1/2+Z; <sup>4</sup>1+X, +Y, +Z; <sup>5</sup>1-X, 2-Y, 1-Z; <sup>6</sup>1+X, 1+Y, +Z; <sup>7</sup>+X, 1+Y, +Z; <sup>8</sup>2-X, 1-Y, 1-Z; <sup>9</sup>3/2-X, 1/2+Y, 3/2-Z; <sup>10</sup>-1+X, +Y, +Z; <sup>11</sup>-1+X, -1+Y, +Z; <sup>12</sup>1/2-X, -1/2+Y, 3/2-Z; <sup>13</sup>-1/2+X, 1/2-Y, 1/2+Z; <sup>14</sup>1-X, -Y, 1-Z; <sup>15</sup>1/2-X, 1/2+Y, 3/2-Z; <sup>16</sup>3/2-X, -1/2+Y, 3/2-Z.

**Table S6.** Hydrogen Bonds.

| D  | H  | A               | d(D-H)/Å  | d(H-A)/Å  | d(D-A)/Å | D-H-A/° |
|----|----|-----------------|-----------|-----------|----------|---------|
| O3 | H3 | O7              | 1.00(2)   | 2.19(8)   | 3.005(2) | 138(9)  |
| O6 | H6 | O2 <sup>1</sup> | 0.958(18) | 1.680(18) | 2.631(2) | 172(3)  |

<sup>1</sup>1/2+X, 1/2-Y, -1/2+Z<sup>1</sup>1-X, 1-Y, 1-Z; <sup>2</sup>2-X, 1-Y, 1-Z; <sup>3</sup>+X, -1+Y, +Z; <sup>4</sup>1+X, +Y, +Z; <sup>5</sup>1-X, -Y, 1-Z; <sup>6</sup>3/2-X, -1/2+Y, 3/2-Z; <sup>7</sup>1/2-X, 1/2+Y, 3/2-Z; <sup>8</sup>1/2+X, 1/2-Y, -1/2+Z.

**Table S7.** Hydrogen Atom Coordinates (Å×10<sup>4</sup>) and Isotropic Displacement Parameters (Å<sup>2</sup>×10<sup>3</sup>).

| Atom | <i>x</i>  | <i>y</i>  | <i>z</i> | U(eq)  |
|------|-----------|-----------|----------|--------|
| H3   | 7020(130) | 1950(130) | 5750(70) | 30(30) |
| H6   | 9440(40)  | 3480(40)  | 2970(20) | 13(8)  |

**Table S8.** Atomic Occupancy.

| Atom | Occupancy | Atom | Occupancy |
|------|-----------|------|-----------|
| H3   | 0.25      | H6   | 0.75      |



**Table S9.** The bond valence sum (BVS) calculated by PLATON.

| Atom      | BVS           | Atom      | BVS           |
|-----------|---------------|-----------|---------------|
| I1        | +4.843        | O3        | -1.958        |
| S1        | +5.995        | O4        | -1.867        |
| K1        | +1.135        | O5        | -1.954        |
| K2        | +1.175        | <b>O6</b> | <b>-1.548</b> |
| O1        | -2.102        | O7        | -2.196        |
| <b>O2</b> | <b>-1.795</b> |           |               |

**Table S10.** The (*hkl*) index of (001)-oriented single crystal slices for refractive indices measurement.

| ( <i>hkl</i> ) | observed 2 $\theta$ /° | calculated 2 $\theta$ /° |
|----------------|------------------------|--------------------------|
| (00-2)         | 12.840                 | 12.839                   |
| (00-4)         | 25.840                 | 25.843                   |
| (00-8)         | 53.140                 | 53.133                   |

**Table S11.** The measured refractive index of K<sub>2</sub>SO<sub>4</sub>·HIO<sub>3</sub> on gem refractometer at 589.3 nm.

| Rotation angle/°      | 0                      | 45   | 90   | 135  | 180  | 225                    | 270  | 315   |
|-----------------------|------------------------|------|------|------|------|------------------------|------|-------|
| <i>n</i> <sub>1</sub> | <b>1.535<br/>(min)</b> | 1.55 | 1.60 | 1.60 | 1.60 | 1.62                   | 1.61 | 1.565 |
| <i>n</i> <sub>2</sub> | 1.61                   | 1.61 | 1.64 | 1.65 | 1.66 | <b>1.675<br/>(max)</b> | 1.65 | 1.62  |

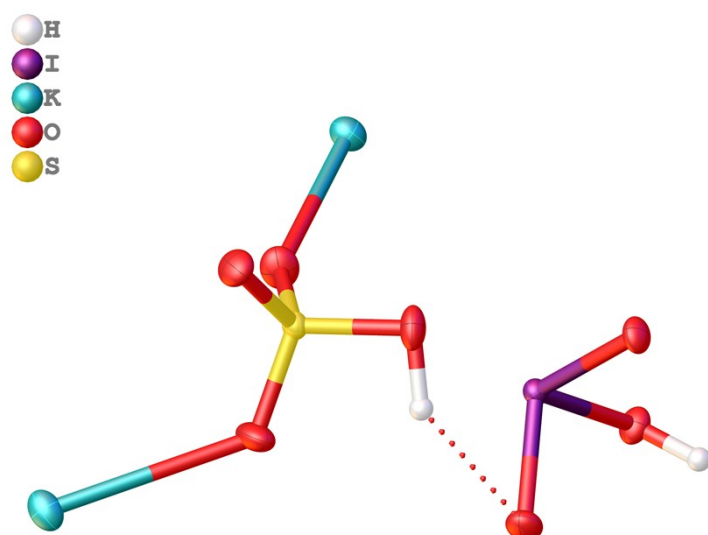

**Fig. S1** Asymmetric unit of  $\text{K}_2\text{SO}_4 \cdot \text{HIO}_3$ .

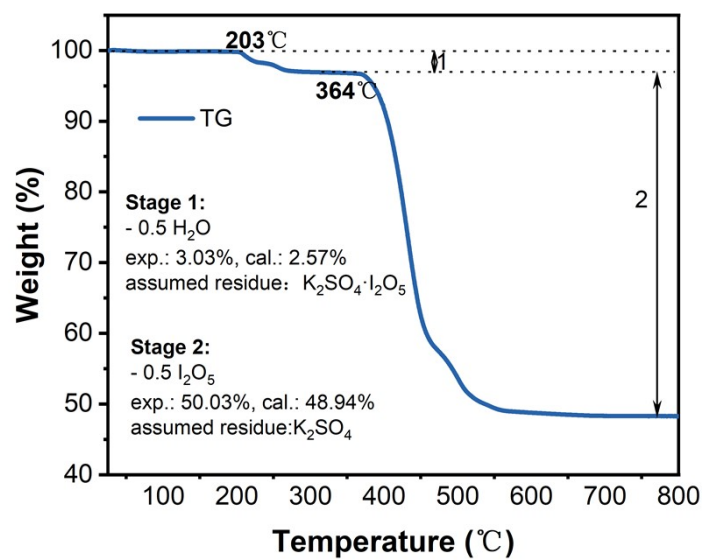

**Fig. S2** The TGA diagram of K<sub>2</sub>SO<sub>4</sub>·HIO<sub>3</sub>.

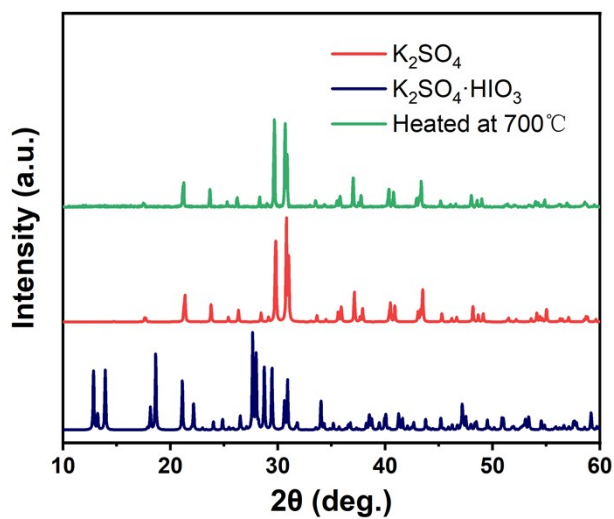

**Fig. S3** PXRD patterns of K<sub>2</sub>SO<sub>4</sub>·HIO<sub>3</sub> measure before and after heating at 700 °C.

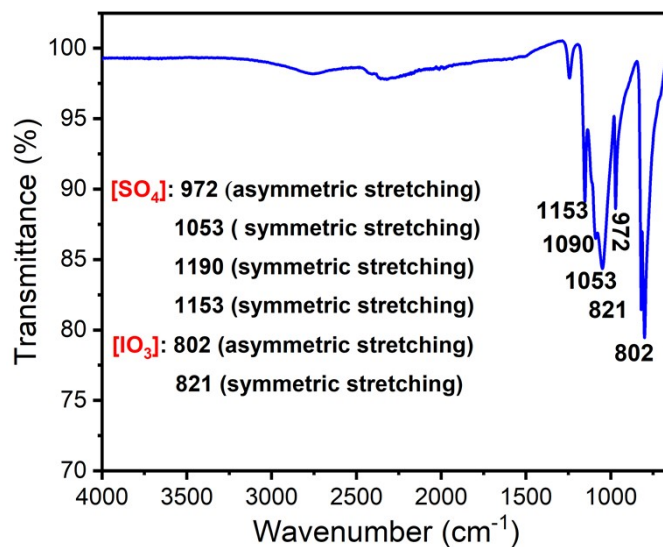

**Fig. S4** The FT-IR spectrum of K<sub>2</sub>SO<sub>4</sub>·HIO<sub>3</sub>.

The asymmetric stretching vibration of [SO<sub>4</sub>] was found at 972 cm<sup>-1</sup> while the symmetric stretching vibrations for [SO<sub>4</sub>] occurred at 1053, 1153, and 1190 cm<sup>-1</sup>. In addition, peaks occurring at 802 and 821 cm<sup>-1</sup> could be assigned to the asymmetric and symmetric stretching vibrations of [IO<sub>3</sub>], respectively.

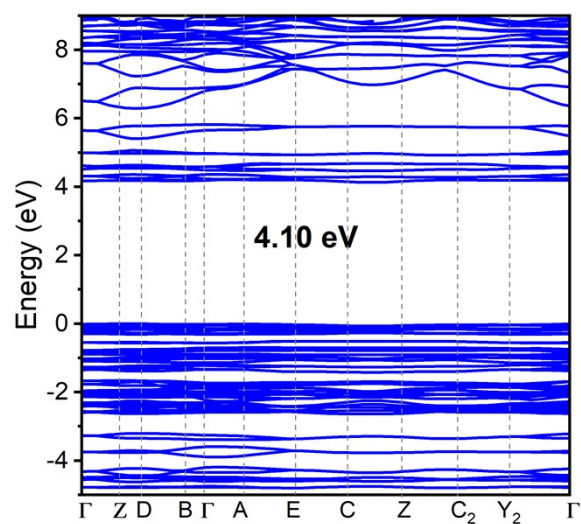

**Fig. S5** The calculated band structure of  $\text{K}_2\text{SO}_4 \cdot \text{HIO}_3$ .

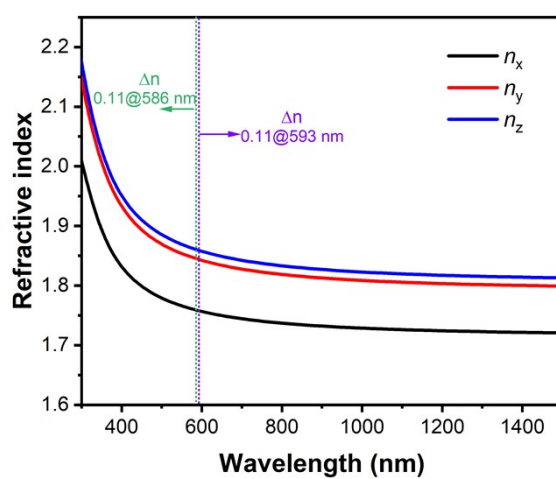

**Fig. S6** The calculated refractive index curves of  $\text{K}_2\text{SO}_4 \cdot \text{HIO}_3$  based on DFT theory.
